# Supplementary material for: Introduction of ferrocene-containing [2]rotaxanes onto siloxane, silsesquioxane and polysiloxanes via click chemistry
Source: Royal Society of Chemistry journal article supplement (doi:10.1039/c2dt31406a), 2012-10-04
Supplement: c2dt31406a.pdf [file c2dt31406a.pdf]

Supplementary Information of

**Introduction of Ferrocene-containing [2]Rotaxanes onto Siloxane,  
Silsesquioxane and Polysiloxanes via Click Chemistry**

Gilbert Yu, Yuji Suzaki, Tomoko Abe and Kohtaro Osakada\*

Chemical Resources Laboratory R1-3, Tokyo Institute of Technology

4259 Nagatsuta, Midoriku, Yokohama 226-8503, Japan

Fax/Tel: +81-45-924-5224

e-mail: kosakada@res.titech.ac.jp

**Experimental Section**

**N<sub>3</sub>CH<sub>2</sub>CH<sub>2</sub>CH<sub>2</sub>Si(OSiMe<sub>3</sub>)<sub>3</sub> (2a)**

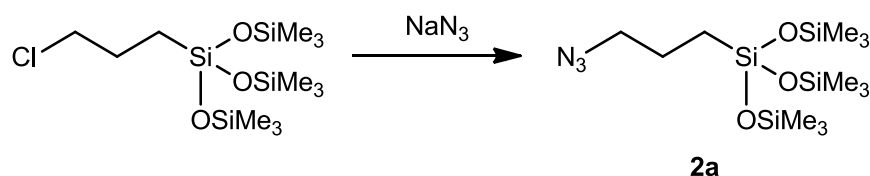

**2a** was prepared by a similar procedure reported in the literature.<sup>1</sup> The reaction of NaN<sub>3</sub> (870 mg, 13 mmol) and ClCH<sub>2</sub>CH<sub>2</sub>CH<sub>2</sub>Si(OSiMe<sub>3</sub>)<sub>3</sub> (2.0 g, 5.4 mmol) in DMF yield **2a** (1.62 g, 4.3 mmol, 80%).

<sup>1</sup>H NMR (400 MHz, CDCl<sub>3</sub>, r.t.) δ 0.10 (s, 27H, Me), 0.50 (m, 2H, CH<sub>2</sub>Si), 1.63 (2H, CH<sub>2</sub>CH<sub>2</sub>N<sub>3</sub>), 3.23 (t, 2H, CH<sub>2</sub>N<sub>3</sub>, *J* = 7.0 Hz) ppm; <sup>13</sup>C{<sup>1</sup>H} NMR (100 MHz, CDCl<sub>3</sub>, r.t.) δ 1.8 (Me), 11.7 (SiCH<sub>2</sub>), 23.3 (SiCH<sub>2</sub>CH<sub>2</sub>), 54.1 (N<sub>3</sub>CH<sub>2</sub>) ppm; IR (KBr disk, r.t.): ν 2097 (N<sub>3</sub>) cm<sup>-1</sup>; ESI-MS (eluent: acetone); calcd for C<sub>12</sub>H<sub>34</sub>N<sub>3</sub>O<sub>3</sub>Si<sub>4</sub>+H 380.2; found, *m/z* 380.3 [M+H]<sup>+</sup>;

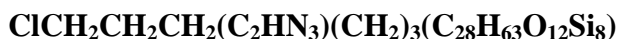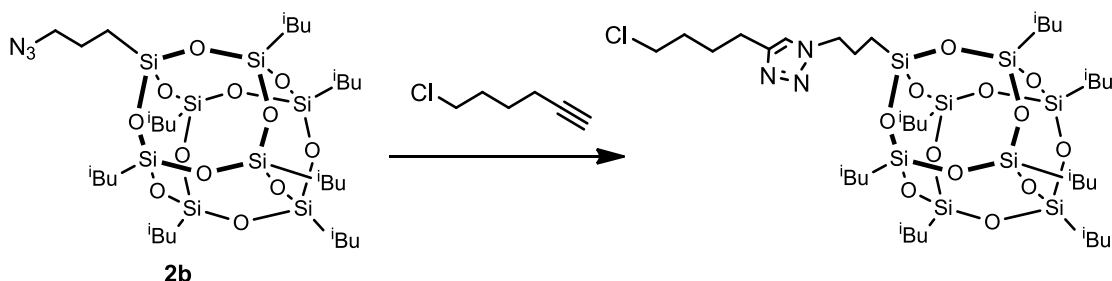

A  $\text{CHCl}_3$  solution (30 mL) containing **2b** (1.20 g, 1.33 mmol),  $\text{ClCH}_2\text{CH}_2\text{CH}_2\text{CH}_2\text{CCH}$  (164 mg, 1.41 mmol) and  $\text{Cu}[\text{Fe}(\text{CN})_4]\text{PF}_6$  (991 mg, 2.66 mmol) was stirred for 48 h at 50 °C. The resulting solution was fractionated between  $\text{H}_2\text{O}$  and  $\text{CH}_2\text{Cl}_2$  and the separated organic phase was dried over  $\text{MgSO}_4$ , filtered and evaporated to yield crude product which was purified by  $\text{SiO}_2$  column chromatography (successive eluent; Hexane,  $\text{Et}_2\text{O}$ , and  $\text{CH}_2\text{Cl}_2$ ) to  $\text{ClCH}_2\text{CH}_2\text{CH}_2(\text{C}_2\text{HN}_3)(\text{CH}_2)_3(\text{C}_{28}\text{H}_{63}\text{O}_{12}\text{Si}_8)$  as a white solid (722 mg, 0.71 mmol, 53%).

$^1\text{H}$  NMR (400 MHz,  $\text{CDCl}_3$ , r.t.)  $\delta$  0.60-0.63 (2H,  $\text{SiCH}_2$ ), 0.598 (d, 6H,  $\text{SiCH}_2$ ,  $J = 7$  Hz), 0.601 (d, 6H,  $\text{SiCH}_2$ ,  $J = 7$  Hz), 0.946 (d, 18H, Me,  $J = 8$  Hz), 0.951 (d, 24H, Me,  $J = 8$  Hz), 1.78-1.92 (m, 13H), 1.98 (m, 2H), 2.76 (t, 2H,  $\text{C}_{\text{triazole}}\text{CH}_2$ ,  $J = 7$  Hz), 3.57 (t, 2H,  $\text{ClCH}_2$ ,  $J = 7$  Hz), 4.30 (t, 2H,  $\text{NCH}_2$ ,  $J = 7$  Hz), 7.25 (s, 1H,  $\text{C}_2\text{HN}_3$ ) ppm;  $^{13}\text{C}\{^1\text{H}\}$  NMR (100 MHz,  $\text{CDCl}_3$ , r.t.)  $\delta$  9.4 ( $\text{SiCH}_2$ ), 22.59, 22.63, 23.99, 24.00, 24.3, 25.1, 25.82, 25.83, 26.8, 32.2 ( $\text{C}_{\text{triazole}}\text{CH}_2$ ), 44.9 ( $\text{ClCH}_2$ ), 52.5 ( $\text{NCH}_2$ ), 120.5 ( $\text{C}_2\text{HN}_3$ ), 147.7 ( $\text{C}_2\text{HN}_3$ ) ppm; Anal. Calcd for  $\text{C}_{37}\text{H}_{78}\text{N}_3\text{O}_{12}\text{Si}_8\text{Cl}$ : C, 43.69; H, 7.73; N, 4.13%. Found: C, 43.49; H, 7.62; N, 4.05%; HR-ESI-MS (eluent: acetone); calcd for  $\text{C}_{37}\text{H}_{78}\text{N}_3\text{O}_{12}\text{Si}_8\text{Cl}+\text{Na}$  1038.3326; found,  $m/z$  1038.3320  $[\text{M}+\text{Na}]^+$ .

**$\text{N}_3\text{CH}_2\text{CH}_2\text{CH}_2(\text{C}_2\text{HN}_3)(\text{CH}_2)_3(\text{C}_{28}\text{H}_{63}\text{O}_{12}\text{Si}_8)$  (**2c**)**

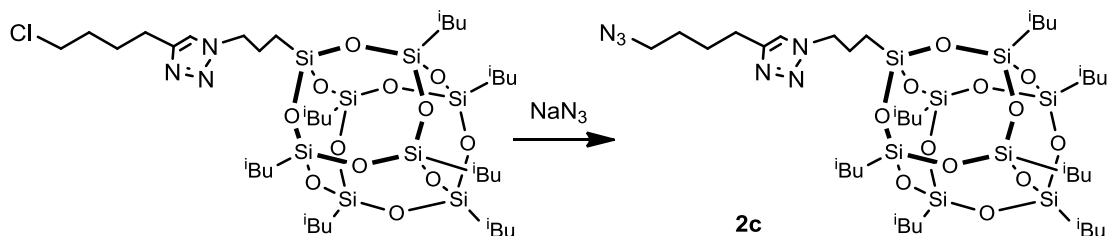

**2c** was prepared by a similar procedure reported in the literature.<sup>1</sup> The reaction of  $\text{NaN}_3$  (319 mg, 4.9 mmol), KI (814 mg, 4.9 mmol) and  $\text{ClCH}_2\text{CH}_2\text{CH}_2(\text{C}_2\text{HN}_3)(\text{CH}_2)_3(\text{C}_{28}\text{H}_{63}\text{O}_{12}\text{Si}_8)$  (960 mg, 0.94 mmol) in DMF (20 mL) at 80 °C overnight. The resulting solution was fractionated between brine and  $\text{CH}_2\text{Cl}_2$ /Hexane and the separated organic phased was dried over  $\text{MgSO}_4$ , filtered and evaporated to yield **2c** as a yellow solid (713 mg, 0.70 mmol, 74%).

$^1\text{H}$  NMR (400 MHz,  $\text{CDCl}_3$ , r.t.)  $\delta$  0.61-0.63 (2H,  $\text{SiCH}_2$ ), 0.601 (d, 6H,  $\text{SiCH}_2$ ,  $J = 7$  Hz), 0.604 (d, 6H,  $\text{SiCH}_2$ ,  $J = 7$  Hz), 0.949 (d, 18H, Me,  $J = 7$  Hz), 0.954 (d, 24H, Me,  $J = 7$  Hz), 1.64-1.72 (m, 2H), 1.75-1.90 (m, 11H), 1.98 (m, 2H), 2.76 (t, 2H,  $J = 7$  Hz), 3.31 (t, 2H,  $\text{N}_3\text{CH}_2$ ,  $J = 7$  Hz), 4.30 (t, 2H,  $\text{NCH}_2$ ,  $J = 8$  Hz), 7.24 (s, 1H,  $\text{C}_2\text{HN}_3$ ) ppm;  $^{13}\text{C}\{^1\text{H}\}$  NMR (100 MHz,  $\text{CDCl}_3$ , r.t.)  $\delta$  9.4 ( $\text{SiCH}_2$ ), 22.6, 22.7, 24.0, 24.1, 25.4, 25.8 (2 signals), 26.8, 28.6 ( $\text{C}_{\text{triazole}}\text{CH}_2$ ), 51.4 ( $\text{NCH}_2$ ), 52.5 ( $\text{NCH}_2$ ), 120.4 ( $\text{C}_2\text{HN}_3$ ), 147.7 ( $\text{C}_2\text{HN}_3$ ) ppm; Anal. Calcd for  $\text{C}_{37}\text{H}_{78}\text{N}_6\text{O}_{12}\text{Si}_8$ : C, 43.41; H, 7.68; N, 8.21%. Found: C, 43.50; H, 7.98; N, 7.94%; HR-ESI-MS (eluent: acetone); calcd for  $\text{C}_{37}\text{H}_{78}\text{N}_6\text{O}_{12}\text{Si}_8 + \text{Na}$  1045.3730; found,  $m/z$  1045.3754  $[\text{M} + \text{Na}]^+$ .

### Synthesis of model compound, $[\text{FcCH}_2\text{NH}_2\text{CH}_2\text{C}_6\text{H}_4\text{-4-nBu}]\text{PF}_6$

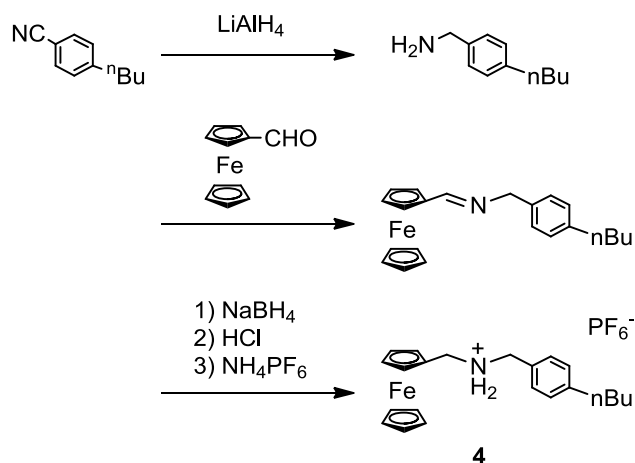

Scheme S1. Synthesis of model compound **4**

### $\text{H}_2\text{NCH}_2\text{C}_6\text{H}_4\text{-4-nBu}$

$\text{NCC}_6\text{H}_4\text{-4-nBu}$  (3.19 g, 20 mmol) was added dropwise to a suspension of  $\text{LiAlH}_4$  (1.55 g, 41 mmol) in THF (150 mL) at room temperature and was refluxed for 15 h. The resulting mixture was cooled to 0 °C, quenched with 1M  $\text{KOH(aq)}$  (ca. 40 mL), and fractionated by addition of hexane. The separated organic phase was dried over  $\text{MgSO}_4$  and evaporation of the solution gave the crude product which was purified by  $\text{SiO}_2$  column chromatography (eluent:  $\text{CHCl}_3/\text{methanol} = 10/1$ ) to give  $\text{H}_2\text{NCH}_2\text{C}_6\text{H}_4\text{-4-nBu}$  as colorless oil (2.22 g, 14 mmol, 70%). The compound was analyzed by  $^1\text{H}$  NMR spectroscopy.<sup>2</sup>

### $\text{FcCH}=\text{NCH}_2\text{C}_6\text{H}_4\text{-4-nBu}$ ( $\text{Fc} = \text{Fe}(\text{C}_5\text{H}_4)(\text{C}_5\text{H}_5)$ )

A solution of ferrocenecarboxaldehyde (2.37 g, 11 mmol) and  $\text{H}_2\text{NCH}_2\text{C}_6\text{H}_4\text{-4-nBu}$  (2.16 g, 13 mmol) in EtOH (200 mL) was stirred for 12 h at 65 °C in the presence of MS4A (molecular sieves 4A, 2.0 g). The reaction mixture was filtered and then evaporated to yield the crude product which was purified by washing

with cold hexane to yield  $\text{FcCH}=\text{NCH}_2\text{C}_6\text{H}_4\text{-4-nBu}$  as a reddish-brown solid (2.35 g, 6.6 mmol, 49%).

$^1\text{H}$  NMR (300 MHz,  $\text{CDCl}_3$ , r.t.)  $\delta$  0.91 (t, 3H, Me,  $J = 7$  Hz), 1.34 (m, 2H,  $\text{CH}_2$ ,  $J = 7$  Hz), 1.58 (m, 2H,  $\text{CH}_2$ ,  $J = 7$  Hz), 2.59 (m, 2H,  $\text{CH}_2$ ), 4.17 (s, 5H,  $\text{C}_5\text{H}_5$ ), 4.37 (m, 2H,  $\text{C}_5\text{H}_4$ ), 4.63 (s, 2H,  $\text{NCH}_2$ ), 4.68 (m, 2H,  $\text{C}_5\text{H}_4$ ), 7.15 (d,  $\text{C}_6\text{H}_4$ ,  $J = 8$  Hz), 7.21 (d,  $\text{C}_6\text{H}_4$ ,  $J = 8$  Hz), 8.23 (s, 1H,  $\text{NCH}$ ) ppm;  $^{13}\text{C}\{^1\text{H}\}$  NMR (75.5 MHz,  $\text{CDCl}_3$ , r.t.)  $\delta$  13.8 (Me), 22.1 ( $\text{CH}_2$ ), 33.5 ( $\text{CH}_2$ ), 35.1 ( $\text{CH}_2$ ), 64.7 ( $\text{NCH}_2$ ), 68.4 ( $\text{C}_5\text{H}_4$ ), 68.9 ( $\text{C}_5\text{H}_5$ ), 70.2 ( $\text{C}_5\text{H}_4$ ), 80.4 ( $\text{C}_5\text{H}_4$ ), 127.6 ( $\text{C}_6\text{H}_4$ ), 128.3 ( $\text{C}_6\text{H}_4$ ), 136.6 ( $\text{C}_6\text{H}_4$ ), 141.2 ( $\text{C}_6\text{H}_4$ ), 161.7 ( $\text{N}=\text{C}$ ) ppm; IR (KBr disk, r.t.):  $\nu$  1636 ( $\text{C}=\text{N}$ )  $\text{cm}^{-1}$ ; Anal. Calcd for  $\text{C}_{22}\text{H}_{25}\text{FeN}+(\text{H}_2\text{O})_{0.25}$ : C, 72.63; H, 7.07; N, 3.85%. Found: C, 72.41; H, 7.16; N, 3.73%.

#### [ $\text{FcCH}_2\text{NH}_2\text{CH}_2\text{C}_6\text{H}_4\text{-4-nBu}$ ] $\text{PF}_6$ (**4**)

$\text{FcCH}=\text{NCH}_2\text{C}_6\text{H}_4\text{-4-nBu}$  (1.79 g, 5.0 mmol) was dissolved in MeOH (50 mL) at room temperature.  $\text{NaBH}_4$  (2.25 g, 59 mmol) was added to the solution and stirred for 4 h at room temperature and then mixed with 4 M HCl to cause the separation of a solid from the solution. The resulting solid was filtered and washed with hexane and  $\text{Et}_2\text{O}$  to yield [ $\text{FcCH}_2\text{NH}_2\text{CH}_2\text{C}_6\text{H}_4\text{-4-nBu}$ ] $\text{Cl}$  (1.81 g, 4.5 mmol) which was used without further purification. Acetone (50 mL) suspension of [ $\text{FcCH}_2\text{NH}_2\text{CH}_2\text{C}_6\text{H}_4\text{-4-nBu}$ ] $\text{Cl}$  (1.81 g) was poured into an acetone solution (50 mL) of  $\text{NH}_4\text{PF}_6$  (3.32 g, 20 mmol) and stirred for 1 h at room temperature. The resulting mixture was filtered and the solids were washed with water and  $\text{CH}_2\text{Cl}_2$  to give [ $\text{FcCH}_2\text{NH}_2\text{CH}_2\text{C}_6\text{H}_4\text{-4-nBu}$ ] $\text{PF}_6$  (**4**) as yellow solid (1.79 g, 3.5 mmol).

$^1\text{H}$  NMR (300 MHz,  $\text{CD}_3\text{CN}$ , r.t.)  $\delta$  0.91 (t, 3H, Me,  $J = 7$  Hz), 1.33 (m, 2H,  $\text{CH}_2$ ,  $J = 7$  Hz), 1.51 (m, 2H,  $\text{CH}_2$ ,  $J = 7$  Hz), 2.62 (m, 2H,  $\text{CH}_2$ ), 4.04 (s, 2H,  $\text{NCH}_2$ ), 4.06 (s, 2H,  $\text{NCH}_2$ ), 4.21 (s, 5H,  $\text{C}_5\text{H}_5$ ), 4.27 (m, 2H,  $\text{C}_5\text{H}_4$ ), 4.37 (m, 2H,  $\text{C}_5\text{H}_4$ ), 7.26 (d,  $\text{C}_6\text{H}_4$ ,  $J = 8$  Hz), 7.31 (d,  $\text{C}_6\text{H}_4$ ,  $J = 8$  Hz);  $^{13}\text{C}\{^1\text{H}\}$  NMR (75.5 MHz,  $\text{CD}_3\text{CN}$ , r.t.)  $\delta$

13.9 (Me), 22.7 (CH<sub>2</sub>), 33.9 (CH<sub>2</sub>), 35.5 (CH<sub>2</sub>), 48.2 (NCH<sub>2</sub>), 51.4 (NCH<sub>2</sub>), 68.9 (C<sub>5</sub>H<sub>5</sub>), 70.2 (C<sub>5</sub>H<sub>4</sub>), 71.2 (C<sub>5</sub>H<sub>4</sub>), 76.3 (C<sub>5</sub>H<sub>4</sub>), 128.6 (C<sub>6</sub>H<sub>4</sub>), 129.7 (C<sub>6</sub>H<sub>4</sub>), 130.6 (C<sub>6</sub>H<sub>4</sub>), 145.2 (C<sub>6</sub>H<sub>4</sub>) ppm; Anal. Calcd for C<sub>22</sub>H<sub>28</sub>F<sub>6</sub>FeNP: C, 52.09; H, 5.56; N, 2.76%. Found: C, 52.05; H, 5.50; N, 2.79%; IR (KBr disk, r.t.)  $\nu$  3258 (N–H), 3235 (N–H), 824 (P–F), 559 (P–F) cm<sup>-1</sup>.

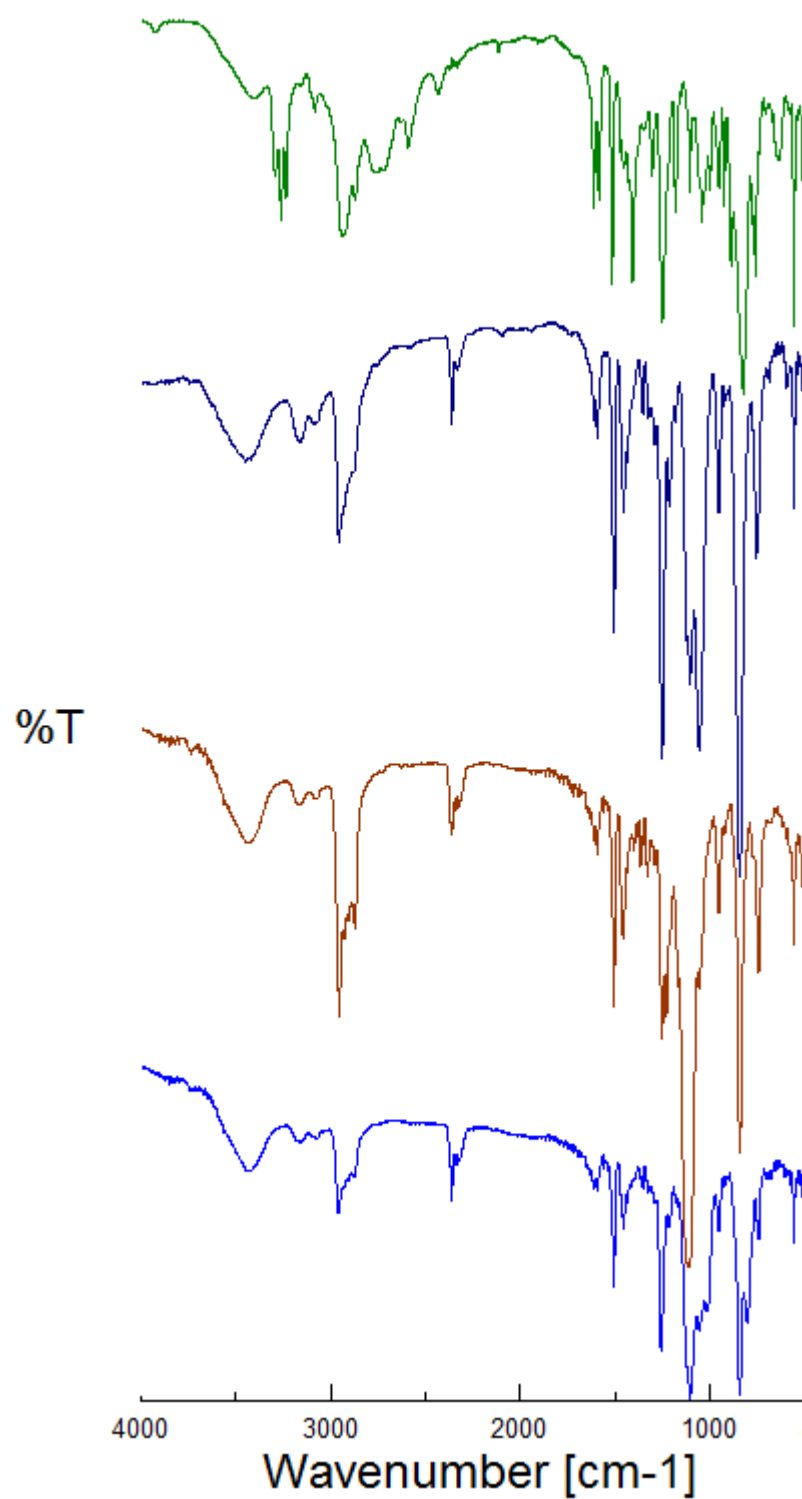

Figure S1, IR spectra of (A) **1**, (B) **3a**, (C) **3b** and (D) **3d** (KBr disk, r.t.).

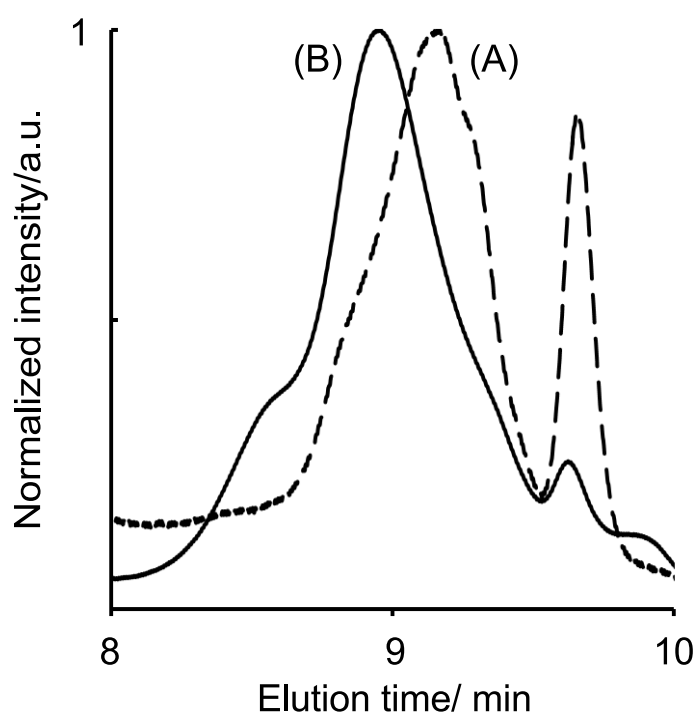

Figure S2, GPC Charts of (A) **2d** and (B) **3d** (eluent; THF).

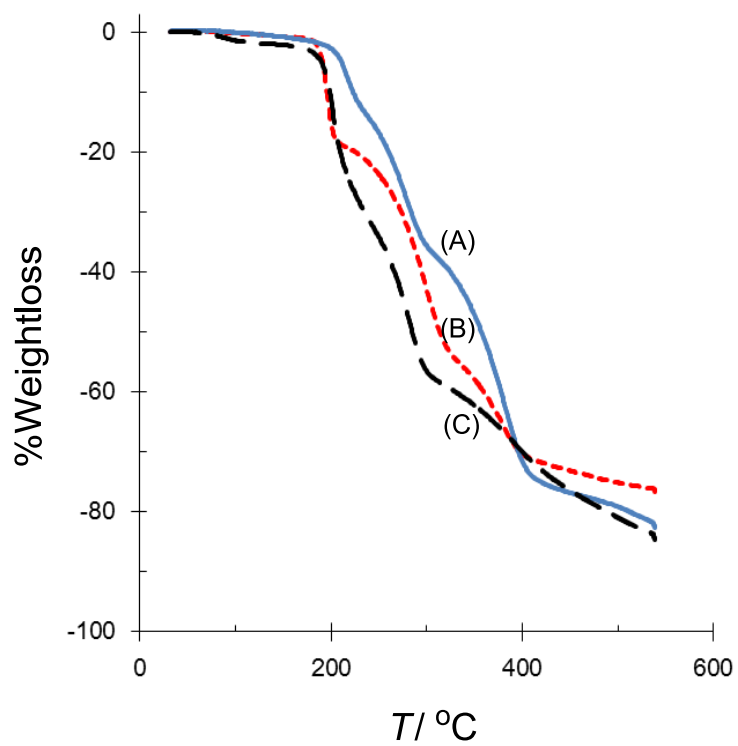

Figure S4, Thermogravimetric (TG) analysis charts of (A) **3a**, (B) **3b** and (C) **3d** (scan rate: 5 °C/min).

Table S1, 5% weight loss temperature,  $T_{d5}$ , of the compounds determined by TG analysis (5 °C/min).

| Compound                                                  | 5% weight loss temperature, $T_{d5}$ |
|-----------------------------------------------------------|--------------------------------------|
| <b>1</b>                                                  | 197 °C                               |
| <b>2c</b>                                                 | 159 °C                               |
| <b>3a</b>                                                 | 193 °C                               |
| <b>3b</b>                                                 | 213 °C                               |
| <b>3d</b>                                                 | 192 °C                               |
| chloropropyl-heptaisobutyl<br>substituted silasesquioxane | 230 °C                               |

Table S2, Crystallographic data of [(DB24C8)4].

|                                                    |                                                                     |
|----------------------------------------------------|---------------------------------------------------------------------|
| Formula                                            | C <sub>50</sub> H <sub>68</sub> F <sub>6</sub> FeNO <sub>10</sub> P |
| <i>F<sub>w</sub></i>                               | 1043.90                                                             |
| size of crystal/ mm                                | 0.50 x 0.30 x 0.35                                                  |
| crystal system                                     | monoclinic                                                          |
| space group                                        | <i>P</i> 2 <sub>1</sub> / <i>c</i> (no 14)                          |
| <i>a</i> / Å                                       | 10.108(4)                                                           |
| <i>b</i> / Å                                       | 24.054(9)                                                           |
| <i>c</i> / Å                                       | 21.012(8)                                                           |
| <i>β</i> / °                                       | 92.146(7)                                                           |
| <i>V</i> / Å <sup>3</sup>                          | 5105(4)                                                             |
| <i>Z</i>                                           | 4                                                                   |
| <i>D<sub>c</sub></i> / g cm <sup>-3</sup>          | 1.358                                                               |
| No. of reflections measured                        | 36929                                                               |
| No. of unique reflections                          | 11405                                                               |
| No. of observations ( <i>I</i> > 3.0σ( <i>I</i> )) | 8012                                                                |
| No. of variables                                   | 707                                                                 |
| <i>GOF</i>                                         | 0.966                                                               |
| <i>R</i> , <i>R<sub>w</sub></i>                    | 0.0695, 0.1154                                                      |

## References

- 1) X. Yang, L. Dai and P. W. Carr, *J. Chromatogr. A*, 2003, **996**, 13.
- 2) Pat. US2005/203086 A1, 2005.
